# Supplementary material for: Sensitivity of interglacial Greenland temperature and δ 18 O: ice core data, orbital and increased CO 2 climate simulations
Source: Copernicus journal article supplement (doi:10.5194/cp-7-1041-2011), 2011-09-29

## Supplement

**Supplementary Figure S1:** anomalies between the 2100 and reference HadAM3iso model simulations for: a) surface air temperature (°C) and b) evaporation (mm/day) and c) sea ice extent changes (x axis, month number; y axis,  $10^6$  km<sup>2</sup>). Anomalies as displayed as a function of longitude and latitude, for DJF (December-January-February), JJA (June-July-August) and for the annual mean. On the right side of each panel a and b), zonal mean anomalies are also displayed as a function of latitude.

(a)

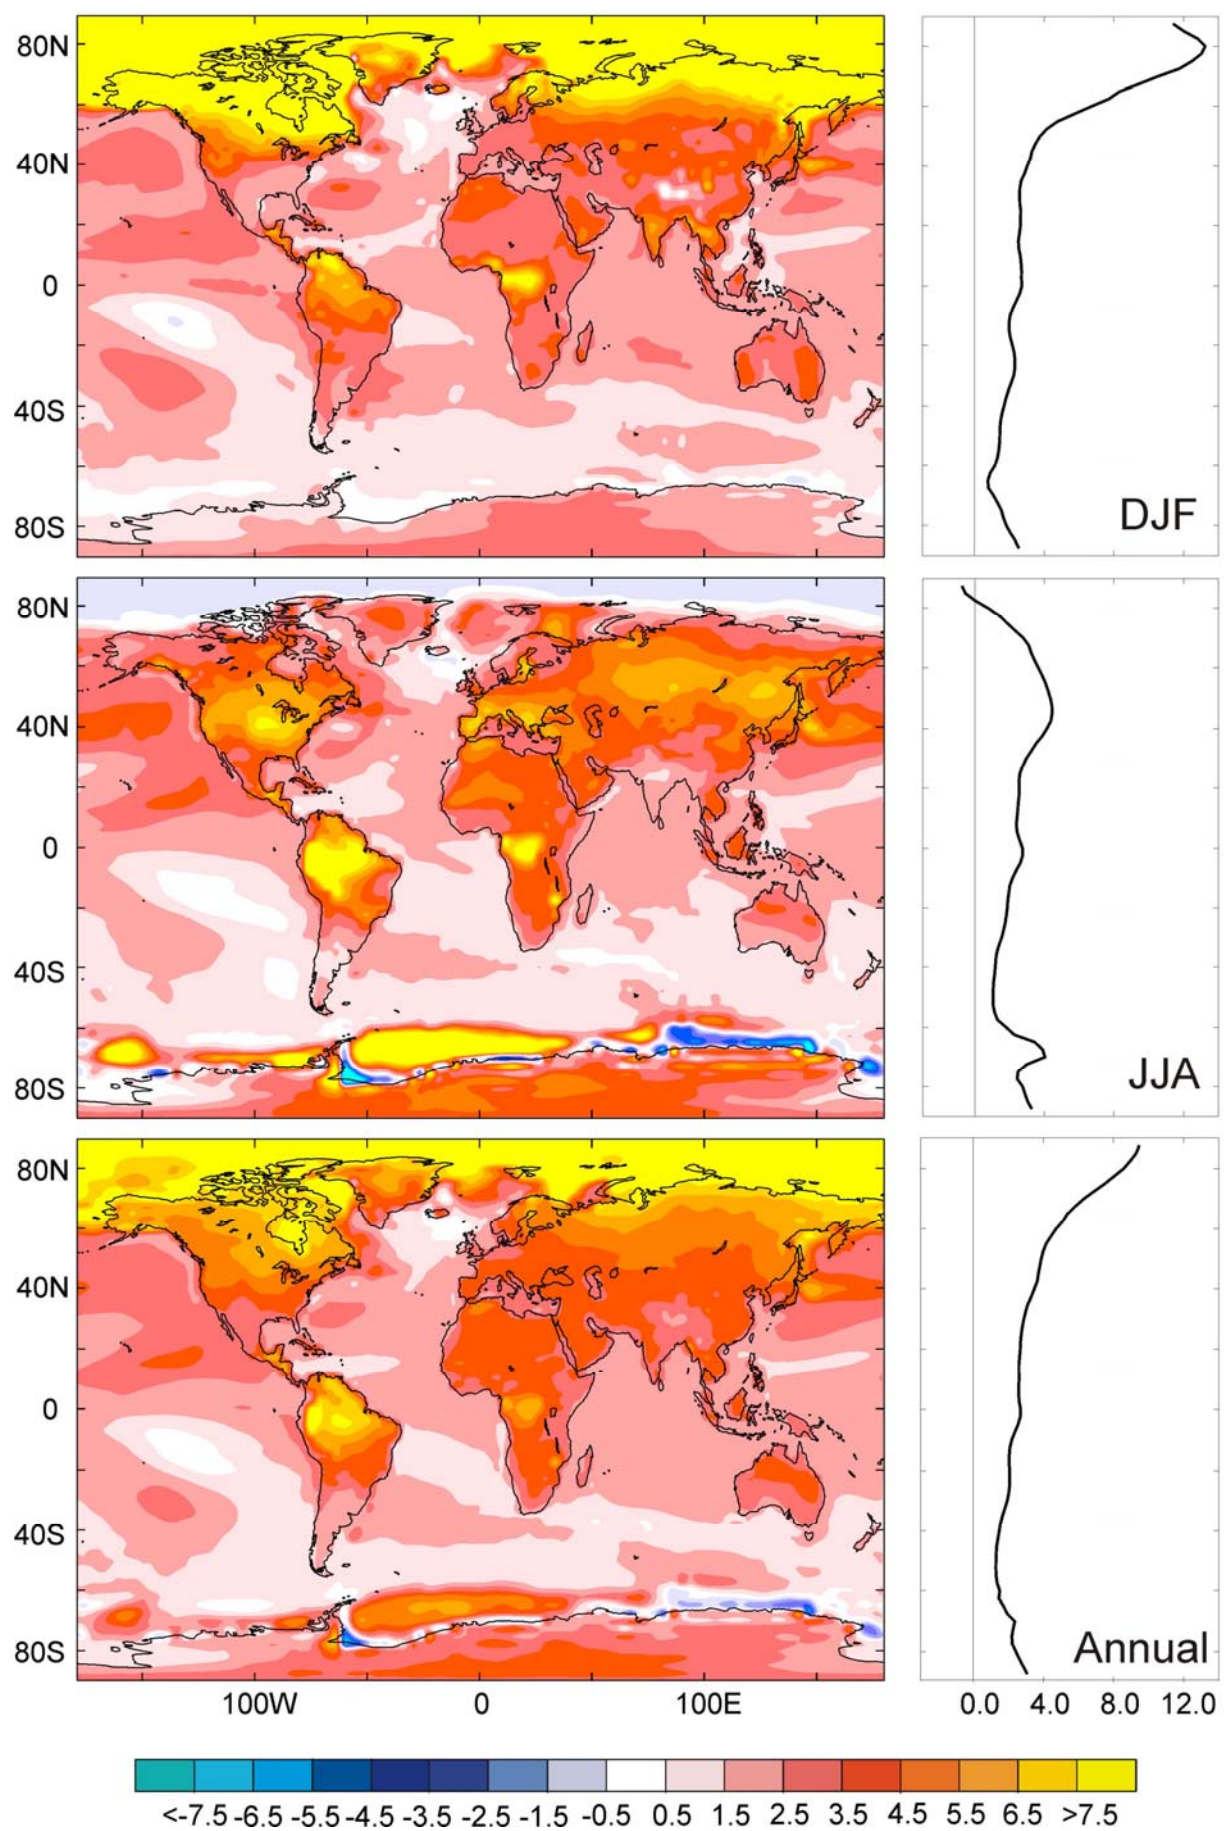

(b)

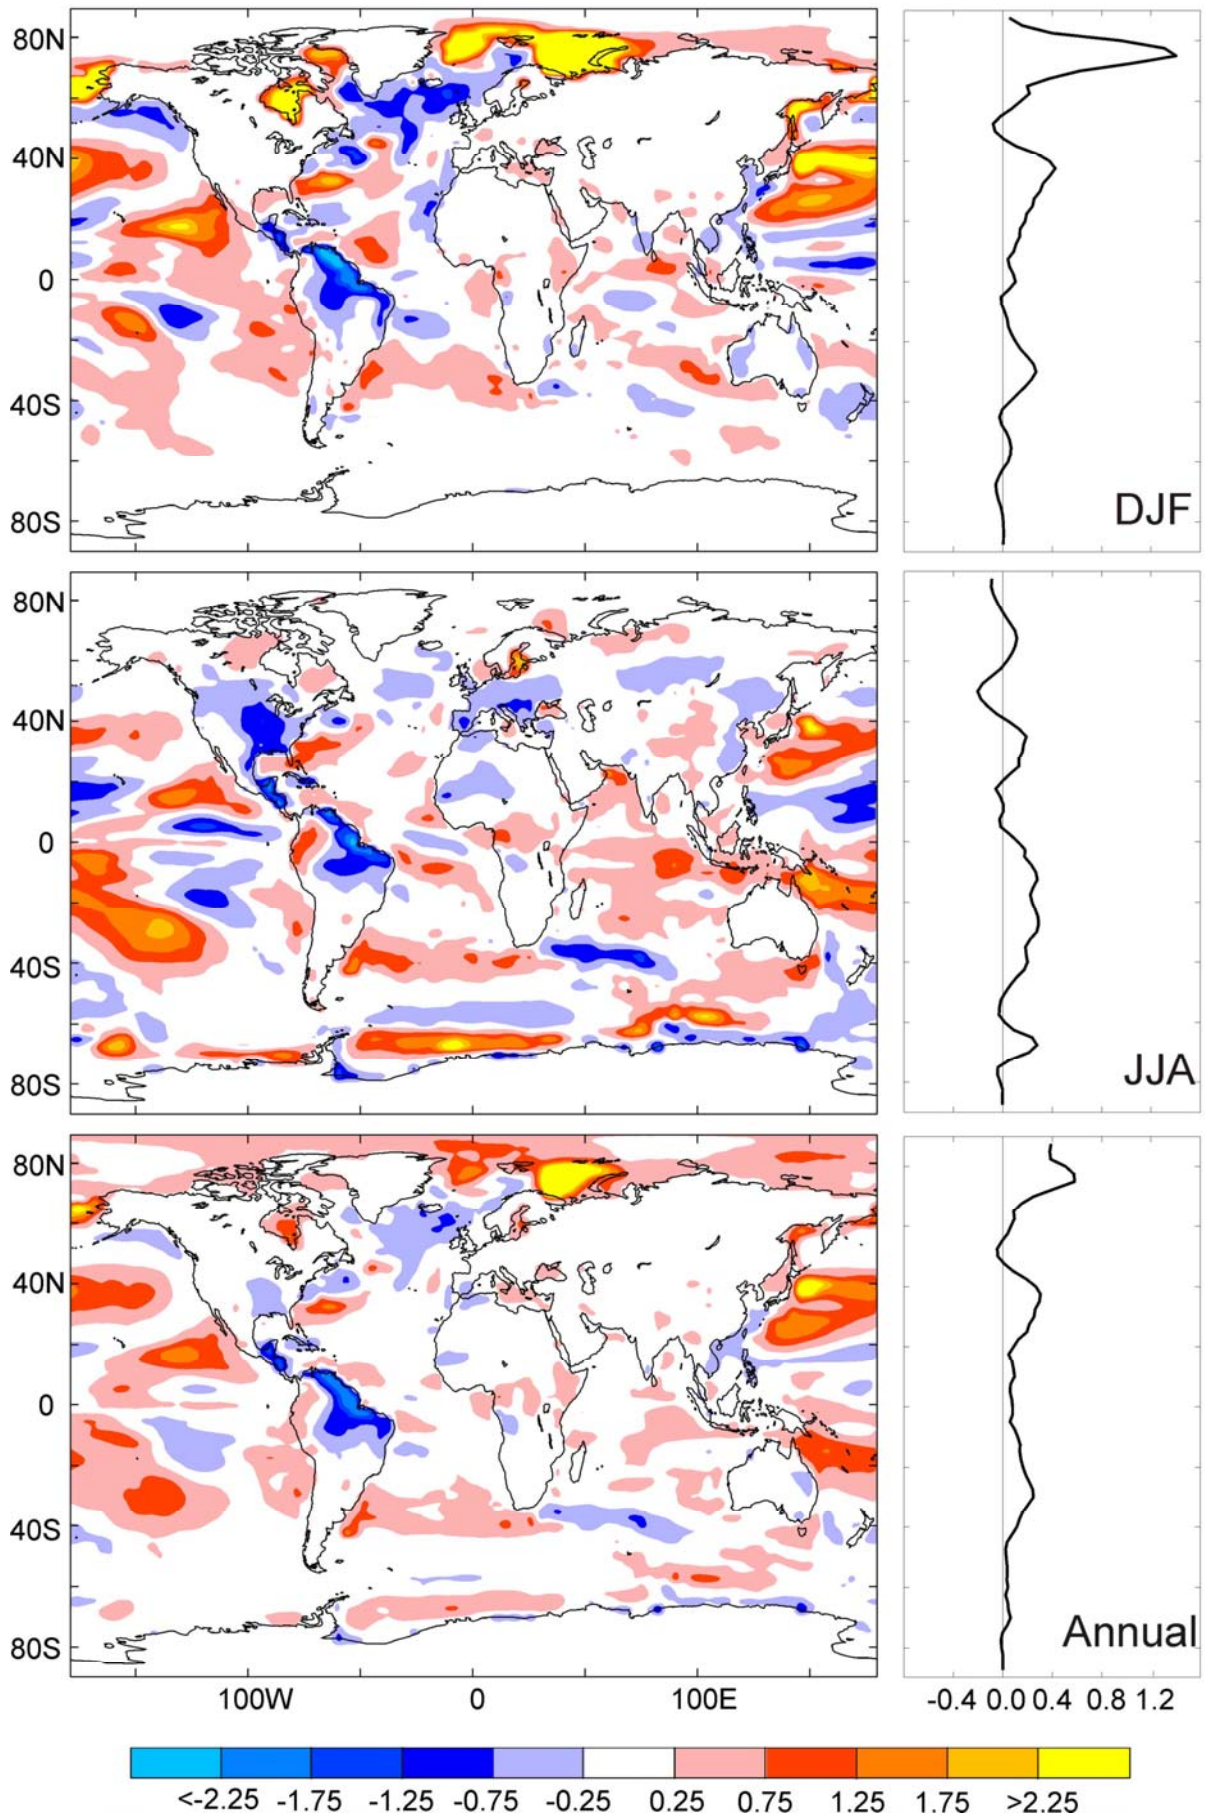

(c)

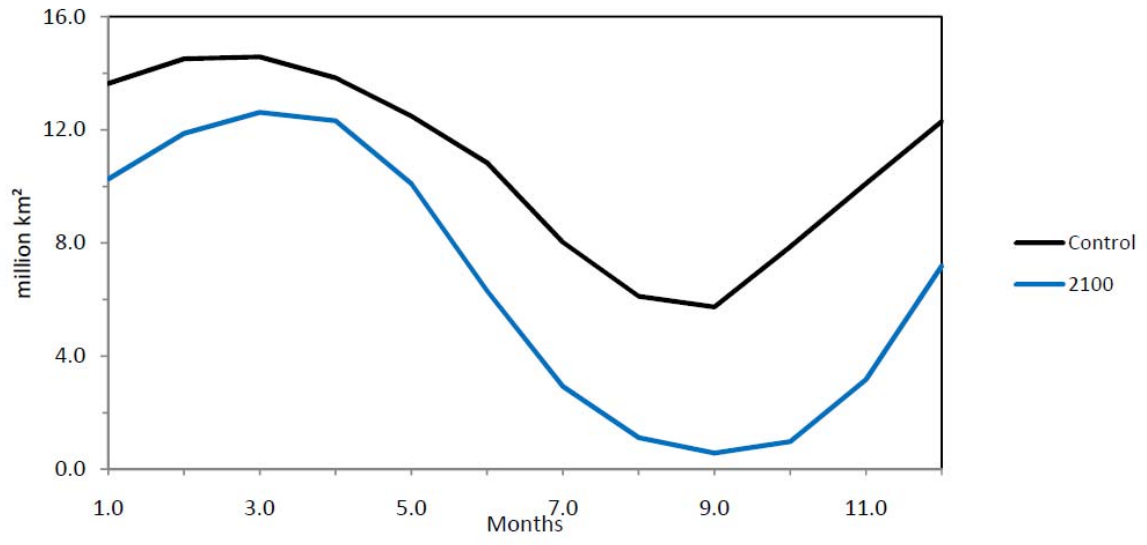

Supplement: Supplementary file 1 [file cp-7-1041-2011-supplement.pdf]
